# Supplementary material for: Epidemiology of Pertussis and Pertussis-Related Complications in Adults: A German Claims Data Analysis
Source: Springer Nature journal article supplement (doi:10.1007/s40121-023-00912-z), 2024-01-31
Supplement: MOESM1 [file 26682022]

1 **Supplementary Material**

2 **Title: Epidemiology of pertussis and pertussis-related complications in adults – a German**  
3 **claims data analysis**

4 Surmann Bastian<sup>1</sup>, Witte Julian<sup>1</sup>, Batram Manuel<sup>1</sup>, Criée Carl Peter<sup>2</sup>, Hermann Christiane<sup>3</sup>, Leischker  
5 Andreas<sup>4,5</sup>, Schelling Jörg<sup>6</sup>, Steinmüller Mirko<sup>7</sup>, Wahle Klaus<sup>8</sup>, Heiseke Alexander F<sup>9\*</sup>, Marijic Pavo<sup>9\*</sup>  
6

7 <sup>1</sup> Vandage GmbH, Bielefeld, Germany

8 <sup>2</sup> Department of Sleep and Respiratory Medicine, Evangelical Hospital Goettingen-Weende,  
9 Bovenden, Germany

10 <sup>3</sup> Department of Clinical Psychology, Justus-Liebig University Giessen, Giessen, Germany

11 <sup>4</sup> Working Group " Vaccination", German Geriatric Society and Department for Geriatrics

12 <sup>5</sup> Asklepios Hospital Wandsbek, Hamburg, Germany

13 <sup>6</sup> Medizinische Klinik IV, Ludwig-Maximilians-University Munich, Munich, Germany

14 <sup>7</sup> PRAXIS DILLTAL, Ehringshausen, Germany

15 <sup>8</sup> Department of General Medicine, University of Muenster, Muenster, Germany

16 <sup>9</sup> GSK, Munich, Germany

17 \* Heiseke A und Marijic P share last authorship

18 **Corresponding author:** Dr. Julian Witte

19 **Email:** julian.witte@vandage.de

20 **Postal address:** Detmolder Straße 30, 33604 Bielefeld, Germany

21 **Telephone number:** +49 151 5064 0017

22

23

24 **Methods**

25 **Table S1 Definition of underlying conditions**

| <b>Underlying condition</b>           | <b>ICD-10 code</b> | <b>Diagnosis</b>                                                                       | <b>ATCs for out-patient diagnosis</b>                                                                                     | <b>Minimum DDD</b> |
|---------------------------------------|--------------------|----------------------------------------------------------------------------------------|---------------------------------------------------------------------------------------------------------------------------|--------------------|
| Asthma                                | J45                | HDIA, NDIA or ("G" and M2Q and min 1 ATC)                                              | D11AH05<br>H02AB<br>R03A<br>R03BA<br>R03BC<br>R03C<br>R03DA<br>R03DB<br>R03DC<br>R03DX05<br>R03DX08<br>R03DX09<br>R03DX10 | 180                |
| Chronic obstructive pulmonary disease | J44, J96           | HDIA, NDIA or ("G" and M2Q)                                                            | R03A<br>R03BB<br>R03C<br>R03DX07                                                                                          | 1                  |
| Diabetes mellitus, type 1             | E10 (NOT E11)      | HDIA, NDIA or ("G" and M2Q and min 1 ATC)                                              | A10A                                                                                                                      | 180                |
| Diabetes mellitus, type 2             | E11                | HDIA, NDIA or ("G" and M2Q and min 1 ATC)                                              | A10A<br>A10B<br>A10X                                                                                                      | 180                |
| Depression                            | F32, F33, F34      | HDIA, NDIA or ("G" and M2Q and min 1 FA-Gruppe 68 OR 61 OR 60 OR 59 OR 58 OR 53 OR 51) | -                                                                                                                         | -                  |
| Coronary heart disease                | I20, I21, I22, I25 | HDIA, NDIA or ("G" and M2Q and min 1 ATC)                                              | B01AC<br>C01DA<br>C01DX11<br>C01DX12<br>C07<br>C08<br>C09XA53<br>C09XA54<br>C09A<br>C09B<br>C09C<br>C09D<br>C10           | 180                |
| Heart failure                         | I50                | HDIA, NDIA or ("G" and M2Q and min 1 ATC)                                              | C01A<br>C03<br>C07<br>C09A<br>C09B<br>C09C<br>C09D                                                                        | 180                |

| Underlying condition   | ICD-10 code                                                                                                                                                                                                                                                                                                         | Diagnosis                                          | ATCs for out-patient diagnosis | Minimum DDD |
|------------------------|---------------------------------------------------------------------------------------------------------------------------------------------------------------------------------------------------------------------------------------------------------------------------------------------------------------------|----------------------------------------------------|--------------------------------|-------------|
| Osteoporosis           | M80, M81                                                                                                                                                                                                                                                                                                            | HDIA, NDIA or ("G" and M2Q and min 1 FA-Gruppe 10) | -                              | -           |
| Rheumatoid arthritis   | M05, M06                                                                                                                                                                                                                                                                                                            | HDIA, NDIA or ("G" and M2Q and min 1 ATC)          | M01A<br>H02AB<br>L04AA         | 1           |
| Chronic kidney disease | N18, N03                                                                                                                                                                                                                                                                                                            | HDIA, NDIA or "G" M2Q                              | -                              | -           |
| Dialysis               | Dialysis costs > 0                                                                                                                                                                                                                                                                                                  | Only with sufficient sample size                   | -                              | -           |
| Immunodeficiency       | B20 – B24, R75, Z21, C00 – C97, D47.9, D55 - D59, D70, D71, D73.0, Q89.01, D73.5, D73.8, D76.1, D80 – D90, G35, K50, K51, L40, M07.0 – M07.3, M09.0, L87.1, L93, M32, M05, M06, M08, M09.0, M30.0, M30.1, M31.3, M31.4, M31.5, M31.6, M31.7, M33, M34, M35.0, M35.1, M35.2, M35.3, , M47.9, N18, S36.04, Z94, Z94.8 | HDIA, NDIA or "G" M2Q                              | -                              | -           |

26 ICD-10 10th revision of the International Classification of Diseases, ATC Anatomical Therapeutic Chemical code,  
27 DDD daily defined dose, "G" assured diagnosis (German "gesichert"), HDIA main diagnosis (German "Hauptdi-  
28 agnose"), NDIA secondary diagnosis (German "Nebendiagnose")  
29

30 **Table S2 Definition of complications**

| Complication                  | ICD-10 code                                            | Diagnosis criteria    |
|-------------------------------|--------------------------------------------------------|-----------------------|
| Severe complications          |                                                        |                       |
| Pneumonia                     | J12, J13, J14, J15, J16, J17, J18                      | M1Q (HDIA, NDIA, "G") |
| Rib fracture                  | S22.3, S22.4                                           | M1Q (HDIA, NDIA, "G") |
| Hospital visit                | All, but excluding all codes specified above and below | M1Q                   |
| Less severe complications     |                                                        |                       |
| Otitis media                  | H65, H66, H67.8                                        | M1Q (HDIA, NDIA, "G") |
| Encephalopathy                | G93.4                                                  | M1Q (HDIA, NDIA, "G") |
| Abnormalities of breathing    | R06                                                    | M1Q (HDIA, NDIA, "G") |
| Seizure                       | R25.2, R56                                             | M1Q (HDIA, NDIA, "G") |
| Inguinal and umbilical hernia | K40, K42                                               | M1Q (HDIA, NDIA, "G") |
| Intracranial hemorrhage       | I60, I61, I62, S06.4, S06.5, S06.6                     | M1Q (HDIA, NDIA, "G") |
| Incontinence                  | N39.3, N39.42                                          | M1Q (HDIA, NDIA, "G") |
| Loss of weight                | R63.4                                                  | M1Q (HDIA, NDIA, "G") |
| Sarcopenia                    | M62.5 (since 2018), R26.3                              | M1Q (HDIA, NDIA, "G") |
| Gait abnormality              | R26                                                    | M1Q (HDIA, NDIA, "G") |
| Sensitivity                   |                                                        |                       |
| All-cause hospitalization     | All                                                    | M1Q                   |

31  
32 ICD-10 10th revision of the International Classification of Diseases, M1Q The complication needs to be present  
33 in the same quarter as the initial pertussis-diagnosis either as an assured (German "gesichert"; "G") main diag-  
34 nosis (German "Hauptdiagnose"; HDIA) or secondary diagnosis (German "Nebendiagnose"; NDIA).

35 **Results**

36 **3.1 Supplemental information on the study cohort**

37 **Table S3 Proportion of patients with underlying conditions in the database**

|                                       | 2016  | 2017  | 2018  | 2019  |
|---------------------------------------|-------|-------|-------|-------|
| Any UC                                | 22.2% | 23.2% | 22.7% | 23.5% |
| Asthma                                | 4.0%  | 4.2%  | 4.2%  | 4.4%  |
| Chronic obstructive pulmonary disease | 2.3%  | 2.4%  | 2.4%  | 2.5%  |
| Osteoporosis                          | 1.8%  | 1.9%  | 1.8%  | 1.8%  |
| Rheumatoid arthritis                  | 0.8%  | 0.9%  | 0.9%  | 0.9%  |
| Depression                            | 7.4%  | 7.9%  | 7.9%  | 8.2%  |
| Immunodeficiency                      | 5.8%  | 6.3%  | 6.3%  | 6.6%  |
| Heart failure                         | 1.4%  | 1.4%  | 1.5%  | 1.5%  |
| Chronic heart disease                 | 3.6%  | 3.7%  | 3.7%  | 3.8%  |
| Chronic kidney disease                | 1.4%  | 1.6%  | 1.7%  | 1.9%  |
| Type 2 diabetes                       | 5.5%  | 5.8%  | 5.7%  | 5.9%  |
| Type 1 diabetes                       | 0.5%  | 0.5%  | 0.5%  | 0.5%  |

38 *UC* underlying condition

39

40 **Table S4 Protocol of matching results**

|                       | 2016           |                | 2017           |                | 2018           |                | 2019           |                |
|-----------------------|----------------|----------------|----------------|----------------|----------------|----------------|----------------|----------------|
|                       | UC             | No UC          |
| <b>Age (years)</b>    |                |                |                |                |                |                |                |                |
| Mean (SD)             | 60.4<br>(16.7) | 60.4<br>(16.7) | 60.6<br>(16.6) | 60.6<br>(16.6) | 60.3<br>(17.1) | 60.3<br>(17.1) | 60.7<br>(16.9) | 60.7<br>(16.9) |
| <b>Age groups (%)</b> |                |                |                |                |                |                |                |                |
| 18–49                 | 22.3%          | 22.3%          | 23.4%          | 23.4%          | 25.4%          | 25.4%          | 26.2%          | 26.2%          |
| 50–59                 | 22.1%          | 22.1%          | 22.8%          | 22.8%          | 23.2%          | 23.2%          | 23.8%          | 23.8%          |
| > 60                  | 55.6%          | 55.6%          | 53.8%          | 53.8%          | 51.5%          | 51.5%          | 50.0%          | 50.0%          |
| <b>Sex (%)</b>        |                |                |                |                |                |                |                |                |
| Male                  | 46.6%          | 46.6%          | 46.6%          | 46.6%          | 46.8%          | 46.8%          | 46.8%          | 46.8%          |
| Female                | 53.4%          | 53.4%          | 53.4%          | 53.4%          | 53.2%          | 53.2%          | 53.2%          | 53.2%          |

41 *UC* underlying condition, *SD* standard deviation

42

43

44 **3.2 Pertussis incidence in patients with and without underlying condition based on the narrow-de-**  
 45 **defined study cohort**

46 Note: In the narrow-defined study cohort, only the pertussis-specific diagnosis code "A37.0 pertussis  
 47 due to *Bordetella pertussis*" is included in the population definition. The broad-defined study cohort  
 48 additionally considers the pertussis-nonspecific diagnosis code "A37.9 pertussis, unspecified."

49 **Table S5 Narrow definition, pertussis incidence (cases per 100,000) in persons with underlying condition per year**

| <b>Underlying condition</b>           | <b>2016</b> | <b>2017</b> | <b>2018</b> | <b>2019</b> |
|---------------------------------------|-------------|-------------|-------------|-------------|
| Total                                 | 8.3         | 9.6         | 6.7         | 6.4         |
| No underlying condition               | 7.6         | 8.1         | 5.5         | 4.9         |
| Any underlying condition              | 10.4        | 14.5        | 10.7        | 10.9        |
| Asthma                                | 14.0        | 14.6        | 17.1        | 15.2        |
| Chronic obstructive pulmonary disease | 15.9        | 12.7        | NA          | 15.1        |
| Osteoporosis                          | NA          | NA          | NA          | 17.3        |
| Rheumatoid arthritis                  | NA          | NA          | NA          | NA          |
| Depression                            | 12.5        | 17.3        | 12.1        | 16.5        |
| Immunodeficiency                      | 12.1        | 13.0        | 10.5        | 11.2        |
| Heart failure                         | NA          | NA          | NA          | NA          |
| Chronic heart disease                 | 15.7        | 10.5        | 7.9         | 9.1         |
| Chronic kidney disease                | 18.5        | NA          | NA          | NA          |
| Type 2 diabetes                       | 9.7         | 15.0        | 7.5         | 6.3         |
| Type 1 diabetes                       | NA          | NA          | NA          | NA          |

50 *NA insufficient sample sizes (n<8)*

51

52 **Table S6 Narrow definition, pertussis incidence (cases per 100,000) in persons with underlying condition (UC) per year**  
 53 **and age group**

| <b>UC</b> | <b>2016</b>       |                   |            | <b>2017</b>       |                   |            | <b>2018</b>       |                   |            | <b>2019</b>       |                   |            |
|-----------|-------------------|-------------------|------------|-------------------|-------------------|------------|-------------------|-------------------|------------|-------------------|-------------------|------------|
|           | <b>18–<br/>49</b> | <b>50–<br/>59</b> | <b>60+</b> |
| Total     | 15.3              | 5.5               | 3.9        | 16.9              | 9.3               | 3.2        | 12.7              | 4.2               | 2.6        | 10.6              | 4.9               | 2.7        |
| No UC     | 15.7              | 5.0               | 2.3        | 16.6              | 6.7               | 1.1        | 12.1              | 2.7               | 0.9        | 10.5              | 1.9               | 1.1        |
| Any UC    | 13.9              | 7.3               | 9.7        | 17.9              | 18.0              | 10.0       | 14.7              | 9.2               | 8.3        | 11.2              | 14.9              | 8.1        |

54 *UC underlying condition*

55

56

57 **3.3 The risk of pertussis incidence in persons with underlying condition**

58 The model shown in Figure 1 checks for multicollinearity in multimorbid patients but does not disen-  
 59 tangle the incremental effect of a multimorbid condition.

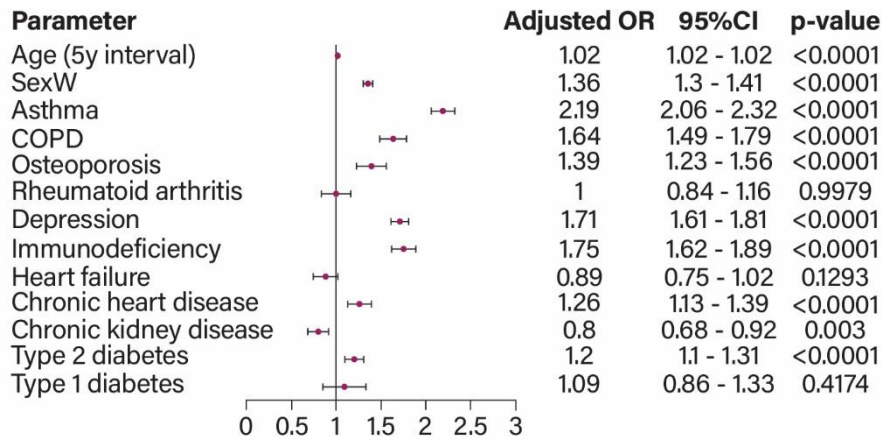

60

61 **Figure S1 Summary of a single logistic regression model, adjusting for age, sex and each prevalent underlying condition**  
 62 **(UC), based on the broad pertussis definition. Study cohort: Rolling UC prevalence and pertussis incidence cohort, 2016–**  
 63 **2019. 5y 5 years, COPD Chronic obstructive pulmonary disease, CI Confidence interval, OR Odds ratio, SexW female sex**

64

65

66 **3.4 Pertussis-related complications**

67 **Table S4 Incidence (%) and absolute difference (percentage points) in the incidence in UC-cohorts experiencing pertussis-**  
 68 **related severe complications in the sensitivity analysis where a complication can also occur in the quarter before and**  
 69 **after the quarter of pertussis incidence**

| UC          |     | Severe complications |      |                 |      |           |     |               |     | Less severe complications |      |
|-------------|-----|----------------------|------|-----------------|------|-----------|-----|---------------|-----|---------------------------|------|
|             |     | Overall              |      | Hospitalization |      | Pneumonia |     | Rib fractures |     | Overall                   |      |
|             |     | %                    | Δ    | %               | Δ    | %         | Δ   | %             | Δ   | %                         | Δ    |
| Disregarded |     | 16.1                 | -    | 13.1            | -    | 5.0       | -   | 0.8           | -   | 9.4                       | -    |
| Any         | Yes | 23.0                 | 10.4 | 16.0            | 4.4  | 7.0       | 3.0 | 1.0           | 0.3 | 12.3                      | 4.4  |
|             | No  | 12.5                 |      | 11.5            |      | 3.9       |     | 0.7           |     | 7.9                       |      |
| Asthma      | Yes | 20.4                 | 4.6  | 15.6            | 2.8  | 6.3       | 1.5 | NA            | NA  | 17.5                      | 8.8  |
|             | No  | 15.7                 |      | 12.8            |      | 4.8       |     | NA            | NA  | 8.7                       |      |
| COPD        | Yes | 27.5                 | 11.9 | 18.6            | 5.7  | 10.2      | 5.4 | NA            | NA  | 19.8                      | 10.7 |
|             | No  | 15.7                 |      | 12.8            |      | 4.8       |     | NA            | NA  | 9.0                       |      |
| Osteo       | Yes | 28.7                 | 12.9 | 27.0            | 14.3 | 9.6       | 4.7 | NA            | NA  | 20.0                      | 10.8 |
|             | No  | 15.8                 |      | 12.7            |      | 4.9       |     | NA            | NA  | 9.2                       |      |
| RA          | Yes | 24.7                 | 8.7  | 16.9            | 3.9  | NA        | NA  | NA            | NA  | 13.0                      | 3.6  |
|             | No  | 16.0                 |      | 13.0            |      | NA        | NA  | NA            | NA  | 9.4                       |      |
| Depr        | Yes | 23.9                 | 9.0  | 15.4            | 2.7  | 6.1       | 1.3 | NA            | NA  | 11.3                      | 2.1  |
|             | No  | 14.9                 |      | 12.7            |      | 4.8       |     | NA            | NA  | 9.1                       |      |
| Immun       | Yes | 23.5                 | 8.2  | 14.8            | 2.0  | 7.3       | 2.6 | NA            | NA  | 13.6                      | 4.7  |
|             | No  | 15.3                 |      | 12.9            |      | 4.7       |     | NA            | NA  | 9.0                       |      |
| HF          | Yes | 49.2                 | 33.5 | 31.1            | 18.4 | 14.8      | 9.9 | NA            | NA  | NA                        | NA   |
|             | No  | 15.7                 |      | 12.8            |      | 4.8       |     | NA            | NA  | NA                        |      |
| CHD         | Yes | 30.7                 | 15.1 | 20.2            | 7.5  | 9.8       | 5.0 | NA            | NA  | 14.7                      | 5.5  |
|             | No  | 15.6                 |      | 12.8            |      | 4.8       |     | NA            | NA  | 9.2                       |      |
| CKD         | Yes | 37.7                 | 21.9 | 16.9            | 3.9  | 11.7      | 6.8 | NA            | NA  | 16.9                      | 7.6  |
|             | No  | 15.7                 |      | 13.0            |      | 4.9       |     | NA            | NA  | 9.3                       |      |
| DMT2        | Yes | 26.9                 | 11.4 | 17.8            | 5.0  | 9.5       | 4.8 | NA            | NA  | 13.0                      | 3.8  |
|             | No  | 15.5                 |      | 12.8            |      | 4.7       |     | NA            | NA  | 9.2                       |      |
| DMT1        | Yes | NA                   | NA   | NA              | NA   | NA        | NA  | NA            | NA  | NA                        | NA   |
|             | No  | NA                   |      | NA              |      | NA        |     | NA            | NA  | NA                        |      |

70 *CHD* Chronic heart disease; *CKD* Chronic kidney disease; *COPD* Chronic obstructive pulmonary disease; *Depr*  
 71 *Depression*; *HF* Heart failure; *Immun* Immunodeficiency; *Osteo* Osteoporosis; *RA* Rheumatoid arthritis; *DMT1*  
 72 *Type 1 diabetes mellitus*; *DMT2* *Type 2 diabetes mellitus*; *UC* Underlying condition  
 73 *NA* Sample size too small ( $n < 8$ );  $\Delta$  Absolute difference

74

75

76

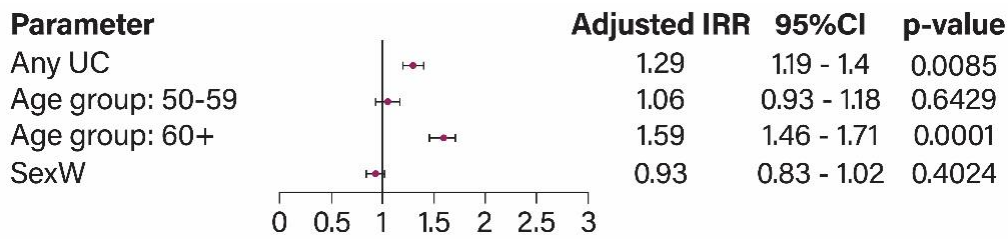

77

78 **Figure S2** Incidence risk of pertussis-associated severe complications in persons with any UC, negative binomial model,  
79 adjusting for age groups, sex and UC. Note: Age group 18–49 years, sex (male) and no UC are reference groups.

80 *UC* Underlying condition, *IRR* incidence rate ratio, *CI* confidence interval, *sexW* female sex

81

82

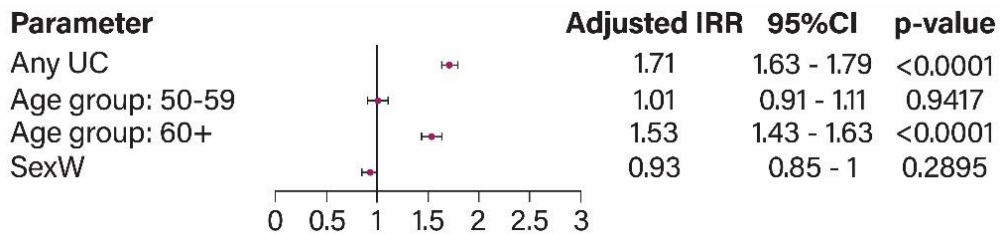

83

84 **Figure S3** Incidence risk of persistent pertussis-associated severe complications in the sensitivity analysis in persons with  
85 any UC, negative binomial model, adjusting for age groups, sex and UC. Note: Age group 18–49 years, sex (male) and no  
86 UC are reference groups

87 *UC* Underlying condition, *IRR* incidence rate ratio, *CI* confidence interval, *sexW* female sex

88
